# Supplementary material for: An optimized prediction framework to assess the functional impact of pharmacogenetic variants
Source: PubMed Central journal article supplement (PMC6462826; doi:10.1038/s41397-018-0044-2), 2018-09-12
Supplement: 41397_2018_44_MOESM1_ESM.pdf [file 41397_2018_44_MOESM1_ESM.pdf]

# Supplementary Figure 1

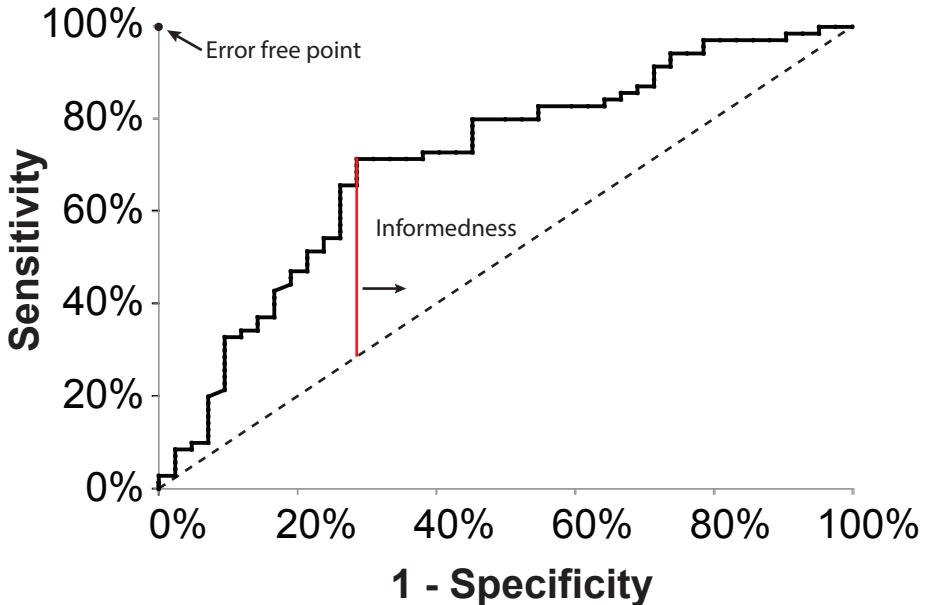

**Supplementary Figure 1: Schematic depiction of the Youden Index and its derivation from an exemplary receiver operating characteristic (ROC) curve.** The Youden index (red line) is the vertical distance between the ROC curve (black line) and the bisectrix (dashed line). Values on the bisectrix (i.e. Youden index = 0) correspond to the inability to discriminate between functional and neutral variants and deciding on the functionality of variants solely by chance. A Youden index of 1 indicates perfect informedness, i.e. 100% sensitivity and 100% specificity. The point at which the Youden index is maximal and closest to the error-free point (0,1) corresponds to the highest probability to make an informed decision and is selected as the ideal threshold score to separate deleterious and function-
