# Supplementary material for: An optimized prediction framework to assess the functional impact of pharmacogenetic variants
Source: PubMed Central journal article supplement (PMC6462826; doi:10.1038/s41397-018-0044-2), 2018-09-12
Supplement: 41397_2018_44_MOESM2_ESM.pdf [file 41397_2018_44_MOESM2_ESM.pdf]

# Supplementary Figure 2

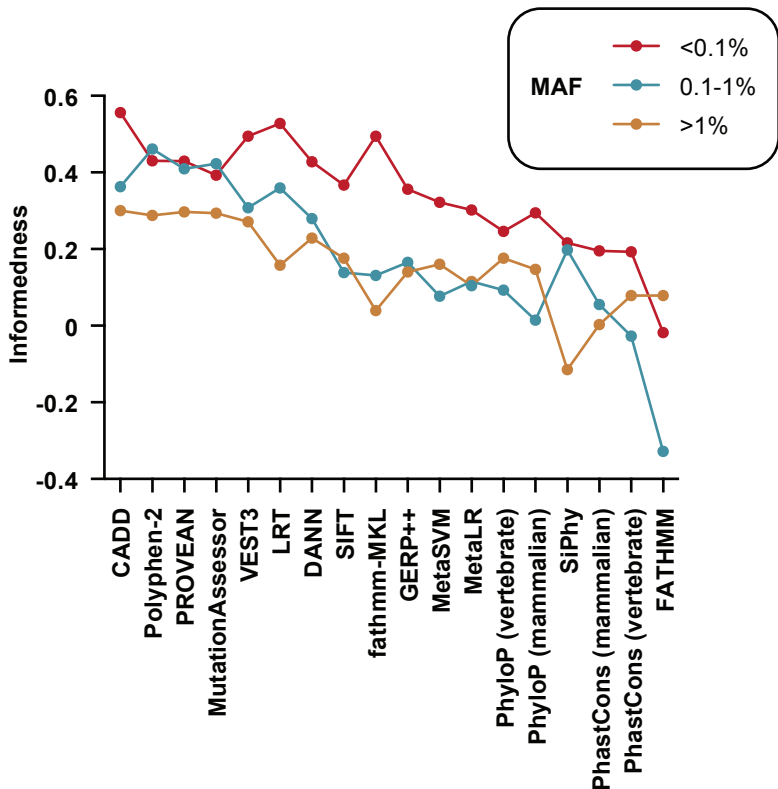

**Supplementary Figure 2: Functionality prediction algorithms and scores perform overall better on rare compared to common pharmacogenetic variants.** Informedness values are shown for variants binned by their minor allele frequency (MAF): <0.1% (n=232, red), 0.1-1% (n=53, blue) and >1% (n=52, yellow)
