# Supplementary material for: An optimized prediction framework to assess the functional impact of pharmacogenetic variants
Source: PubMed Central journal article supplement (PMC6462826; doi:10.1038/s41397-018-0044-2), 2018-09-12
Supplement: 41397_2018_44_MOESM3_ESM.pdf [file 41397_2018_44_MOESM3_ESM.pdf]

# Supplementary Figure 3

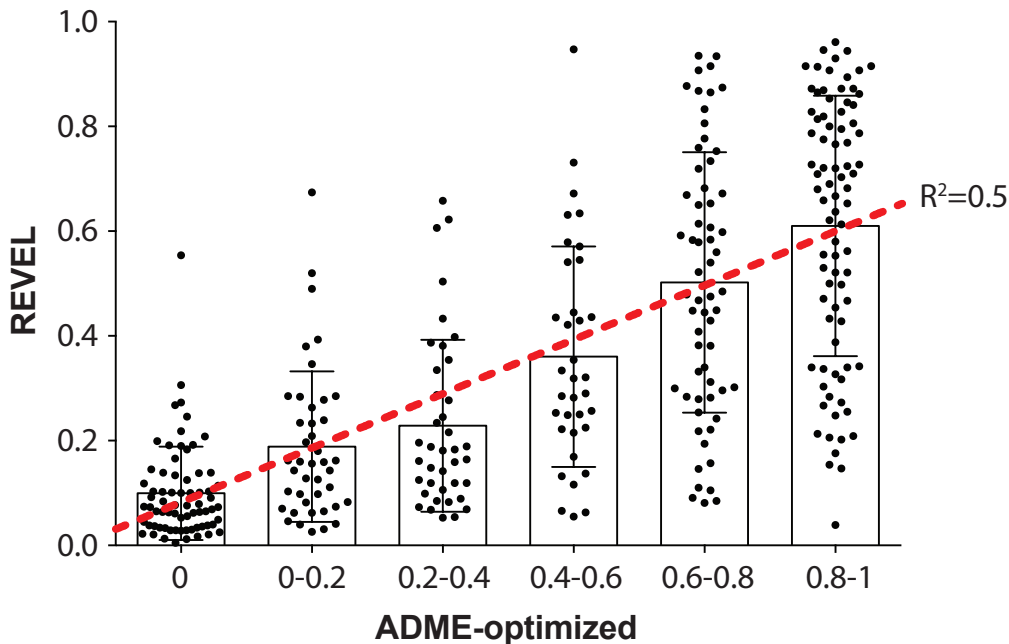

**Supplementary Figure 3: Scores derived by the ADME-optimized prediction model correlate with REVEL scores.** Note that while the scores between the models overall correlate, predictions for individual variants can diverge substantially. Dashed red line indicated linear regression.
